# Supplementary material for: Elevated histone demethylase KDM5C increases recurrent miscarriage risk by preventing trophoblast proliferation and invasion
Source: PubMed Central journal article supplement (PMC9780362; doi:10.1038/s41420-022-01284-y), 2022-12-22

**Figure 1C**

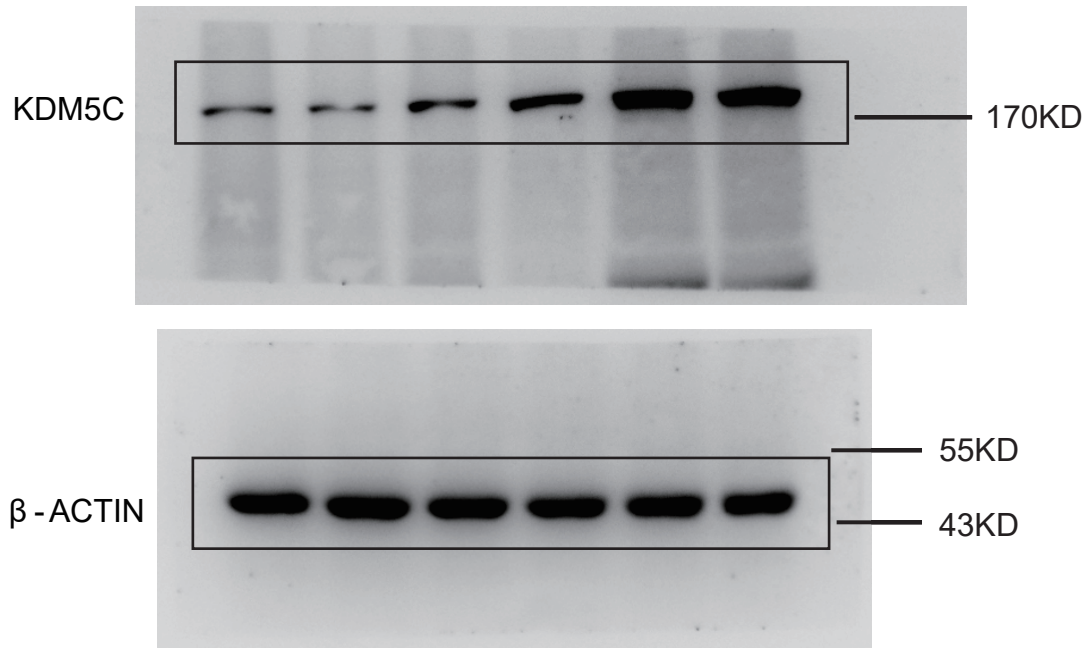

**Figure 2A, right panel**

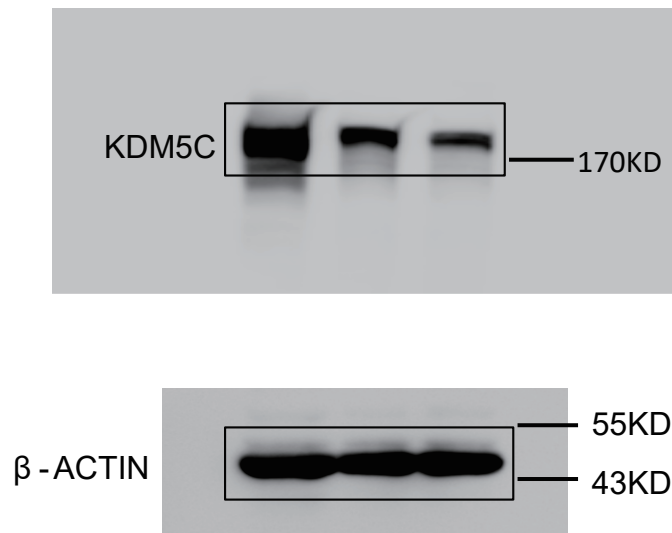

Figure 2A, left panel

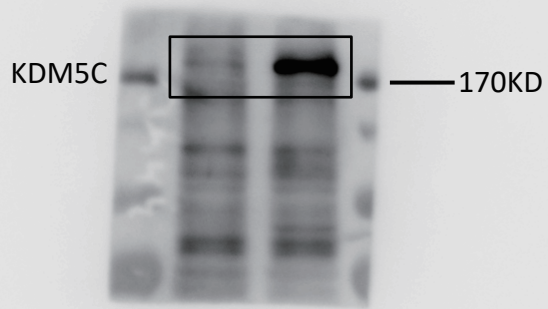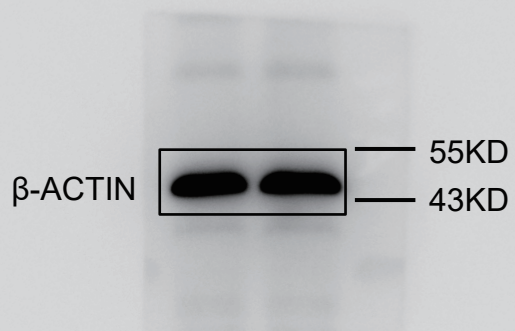

**Figure 3A**

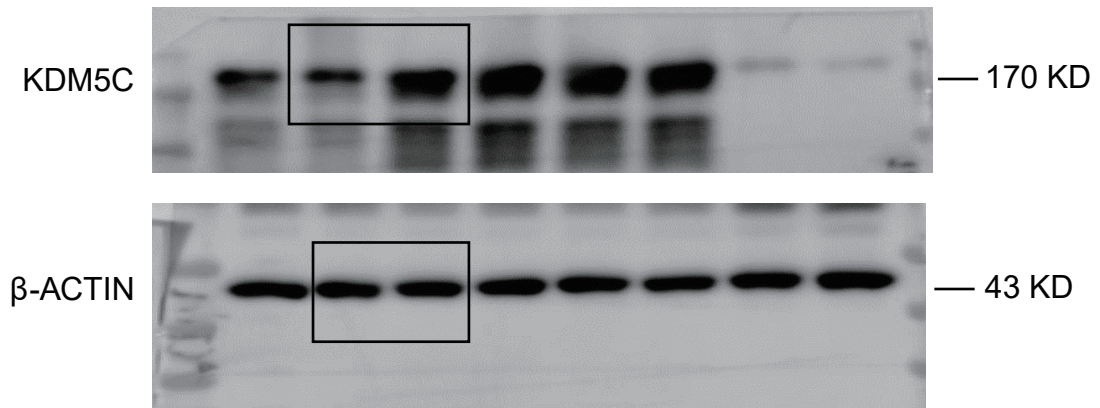

**Figure 3B**

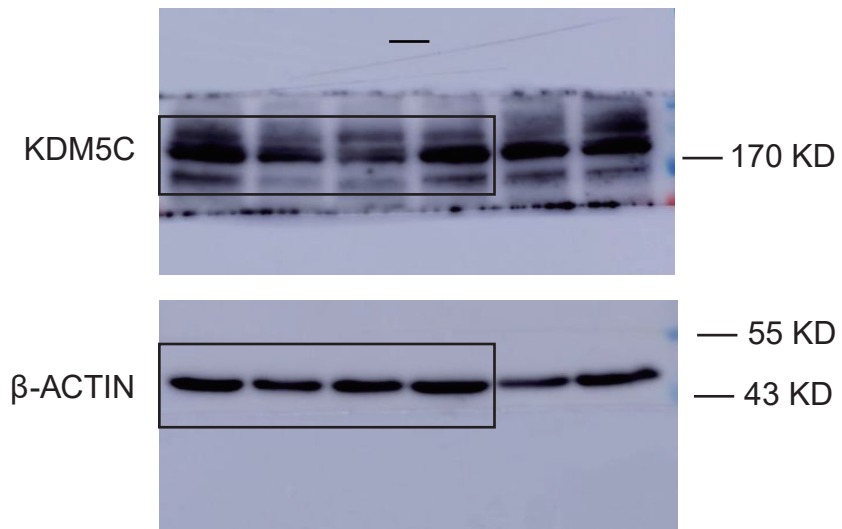

**Figure 3C**

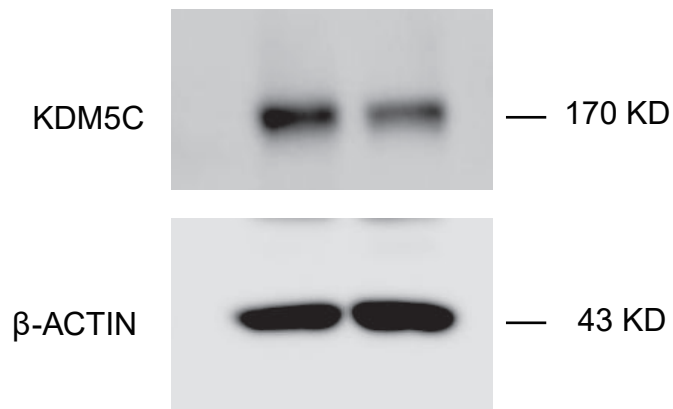

Figure 8B

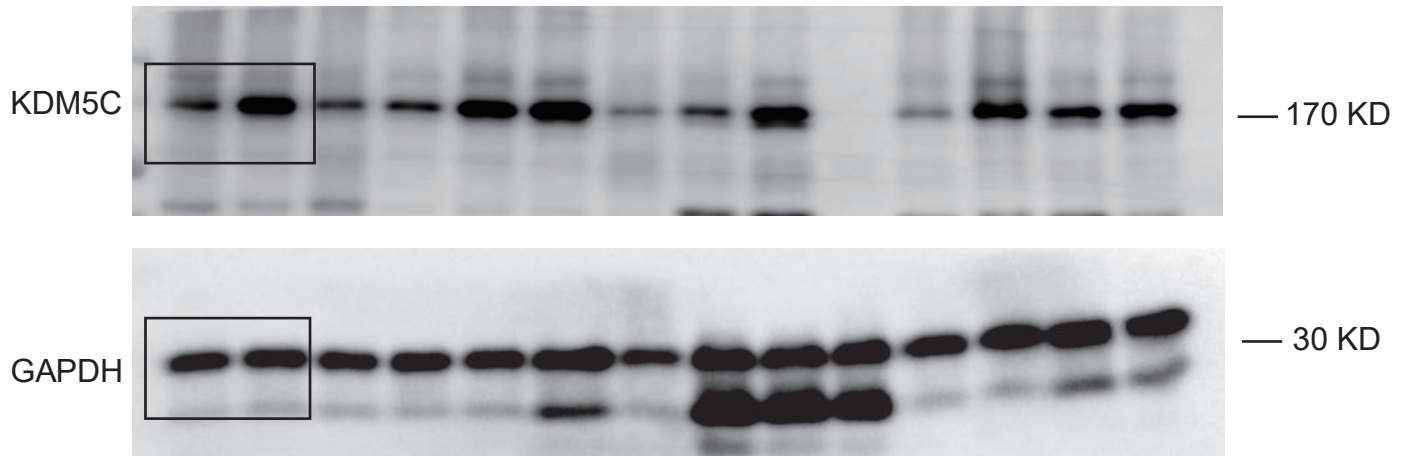

Figure 8D

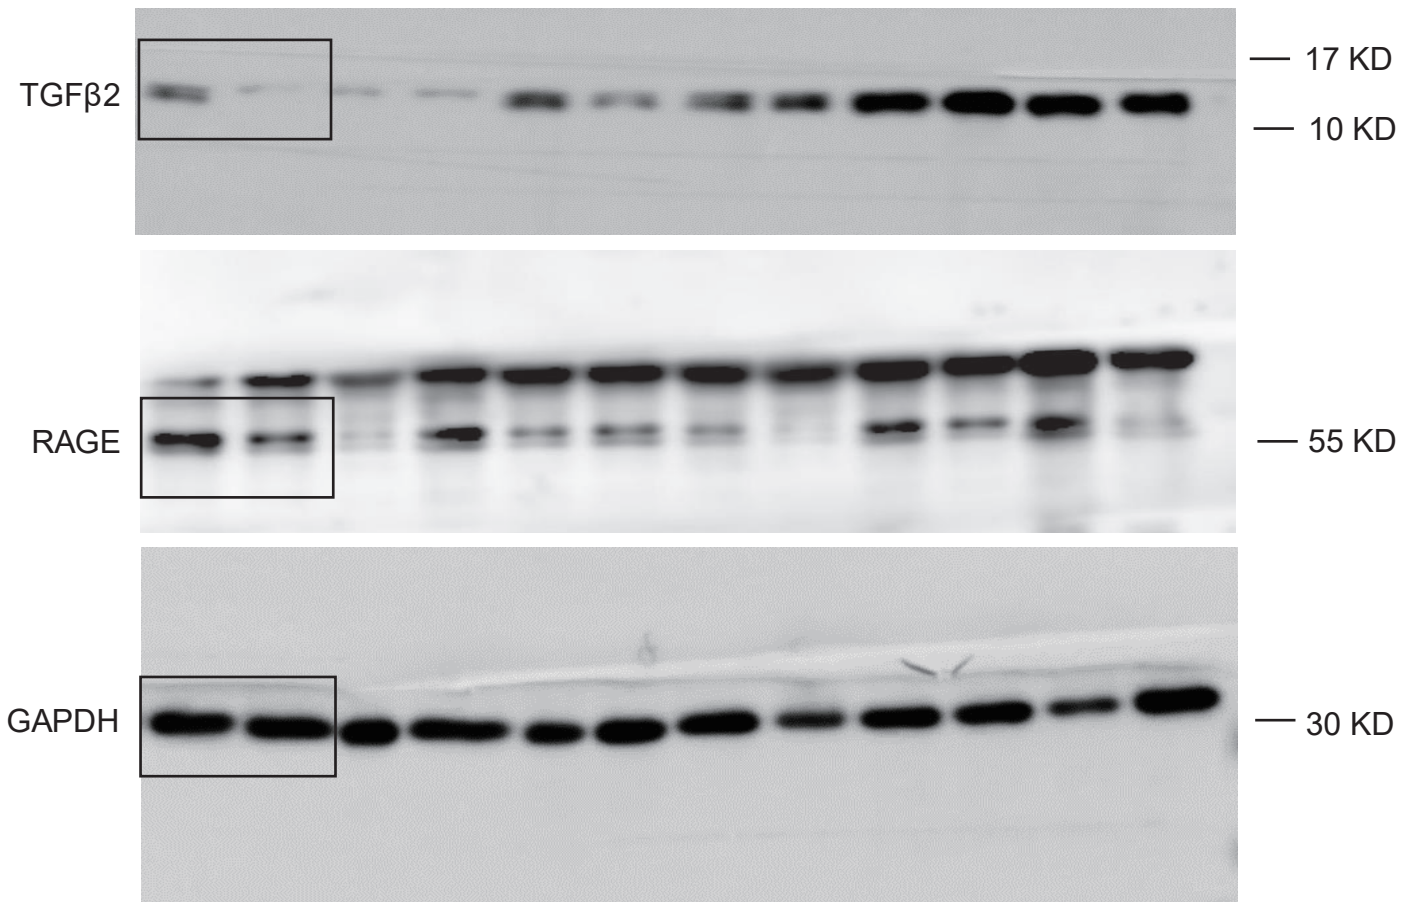



**Figure 8E**

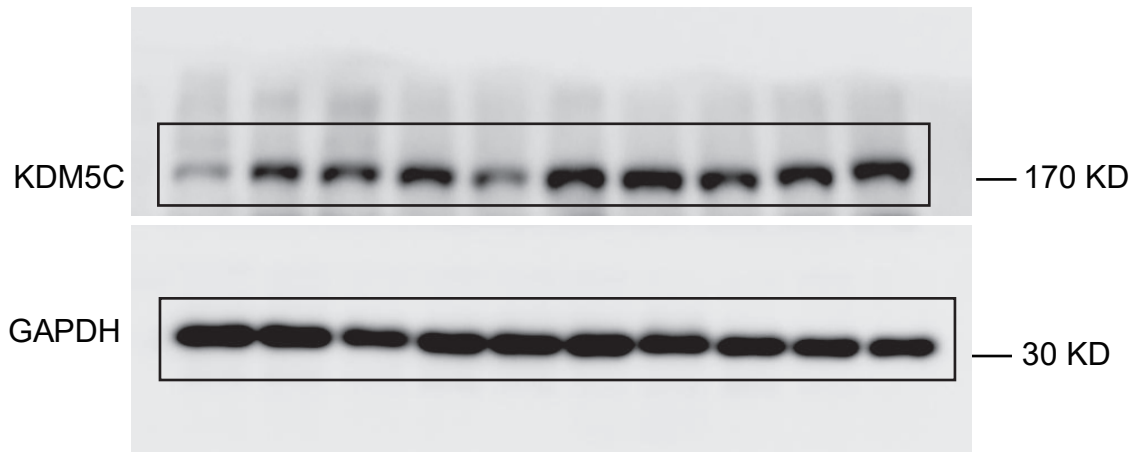

**Figure 8H**

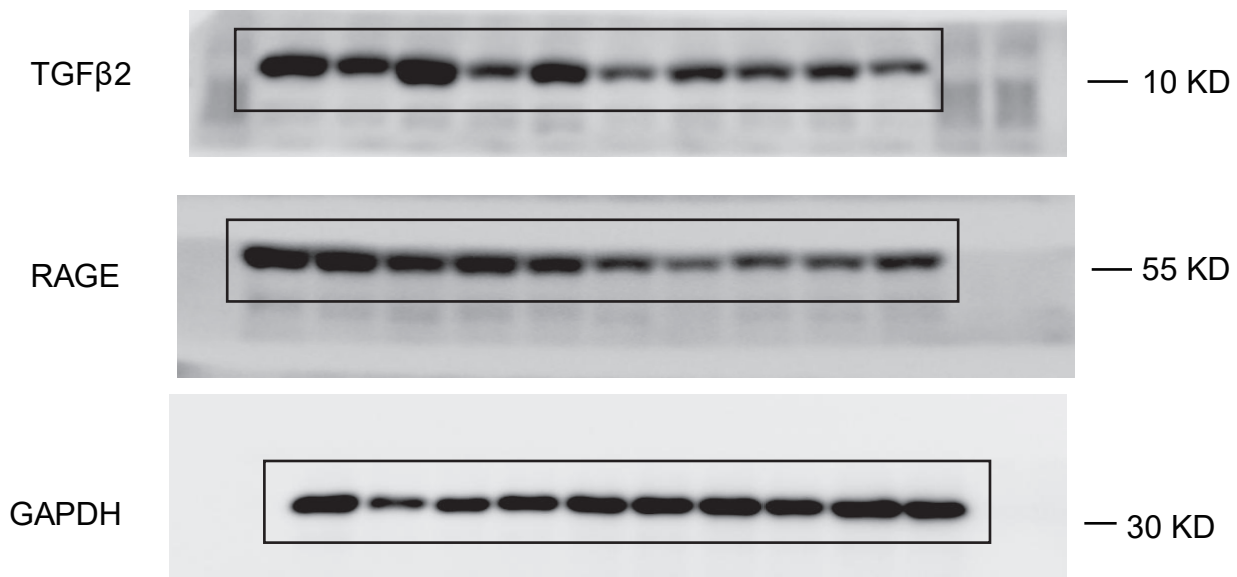

**Supplementary Figure 3A**

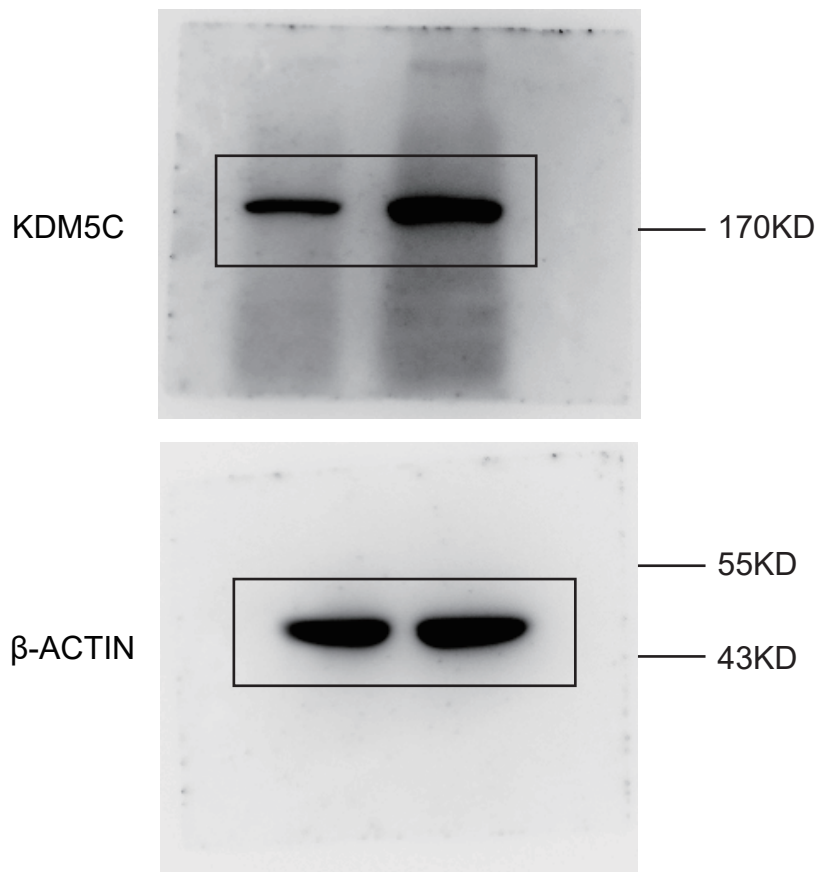

**Supplementary Figure 3B**

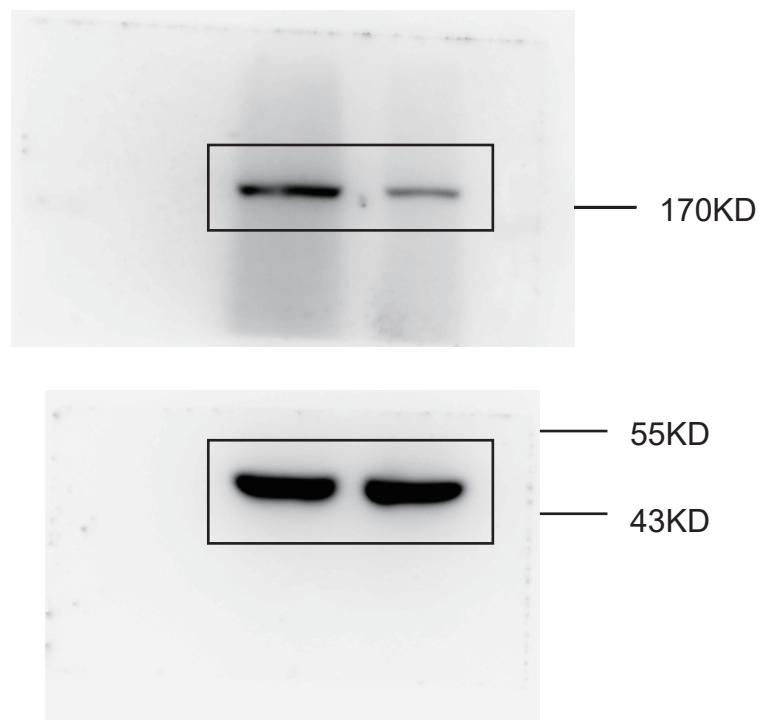

Supplementary Figure 6A

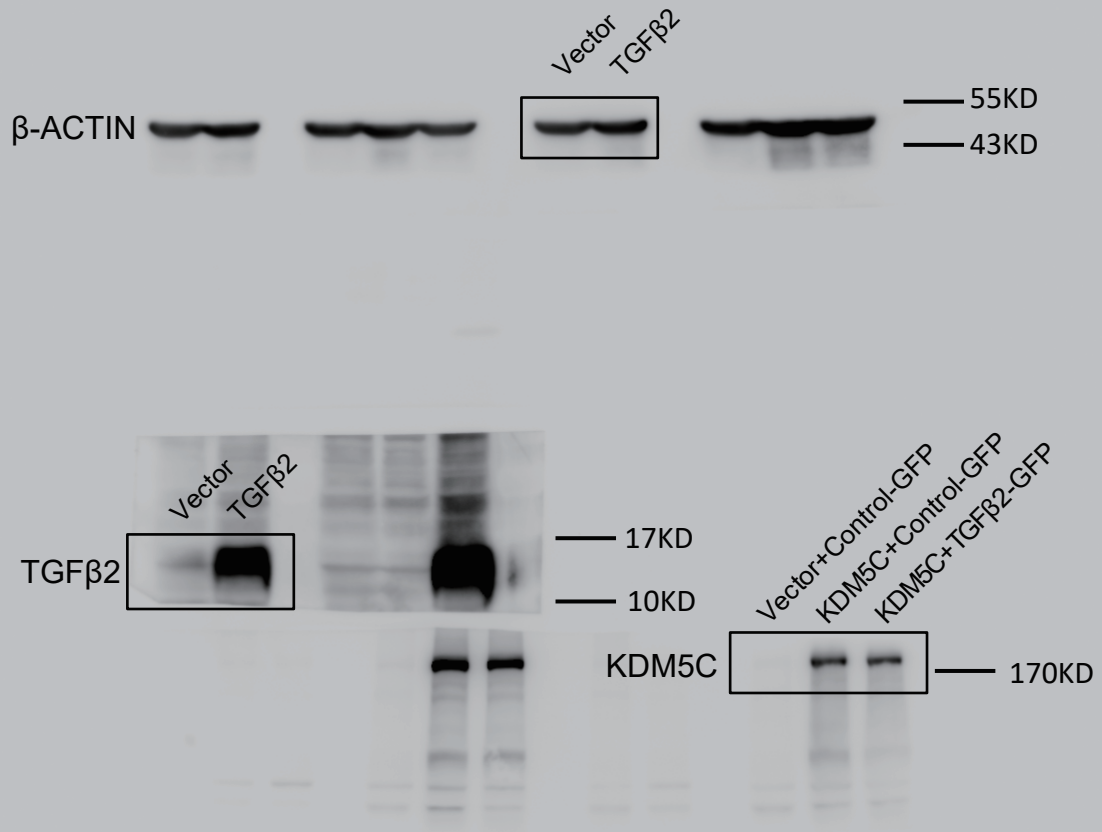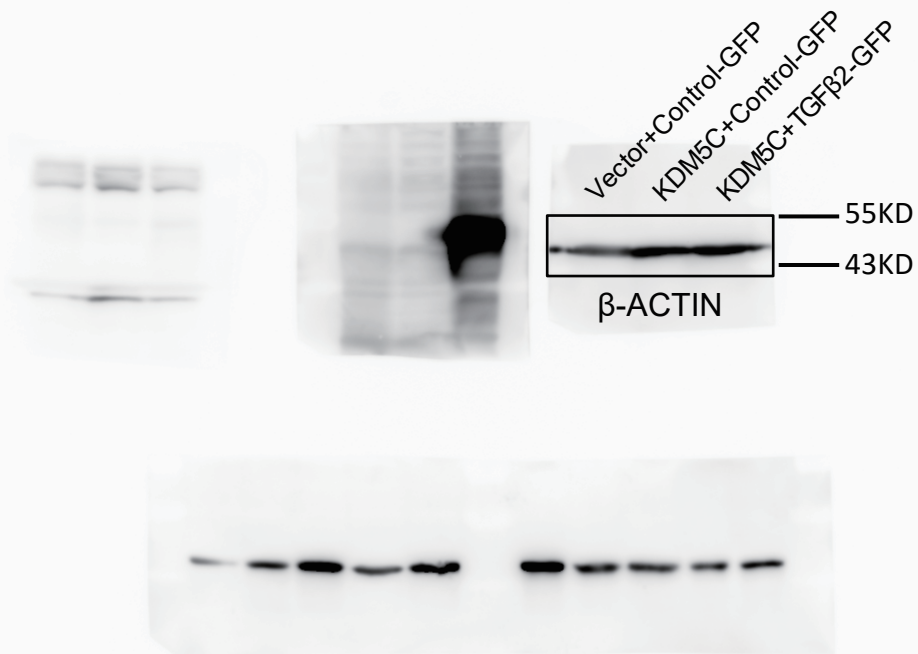

Supplementary Figure 6A

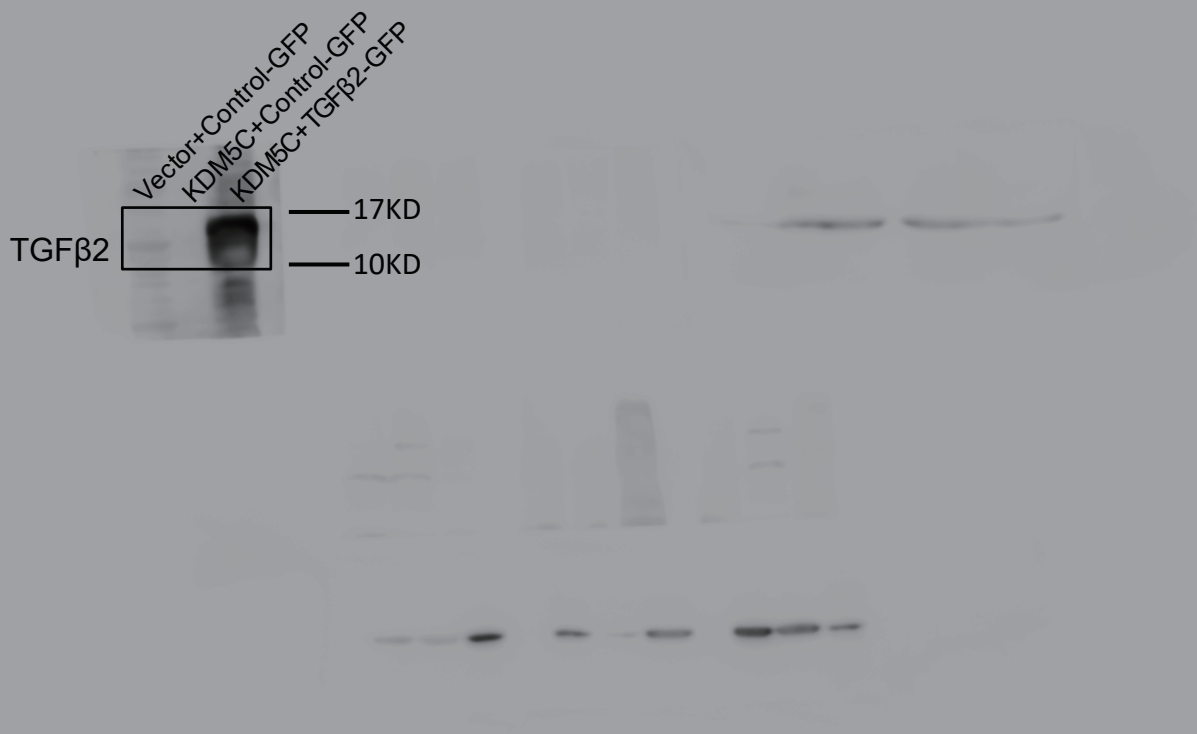

Supplementary Figure 6B

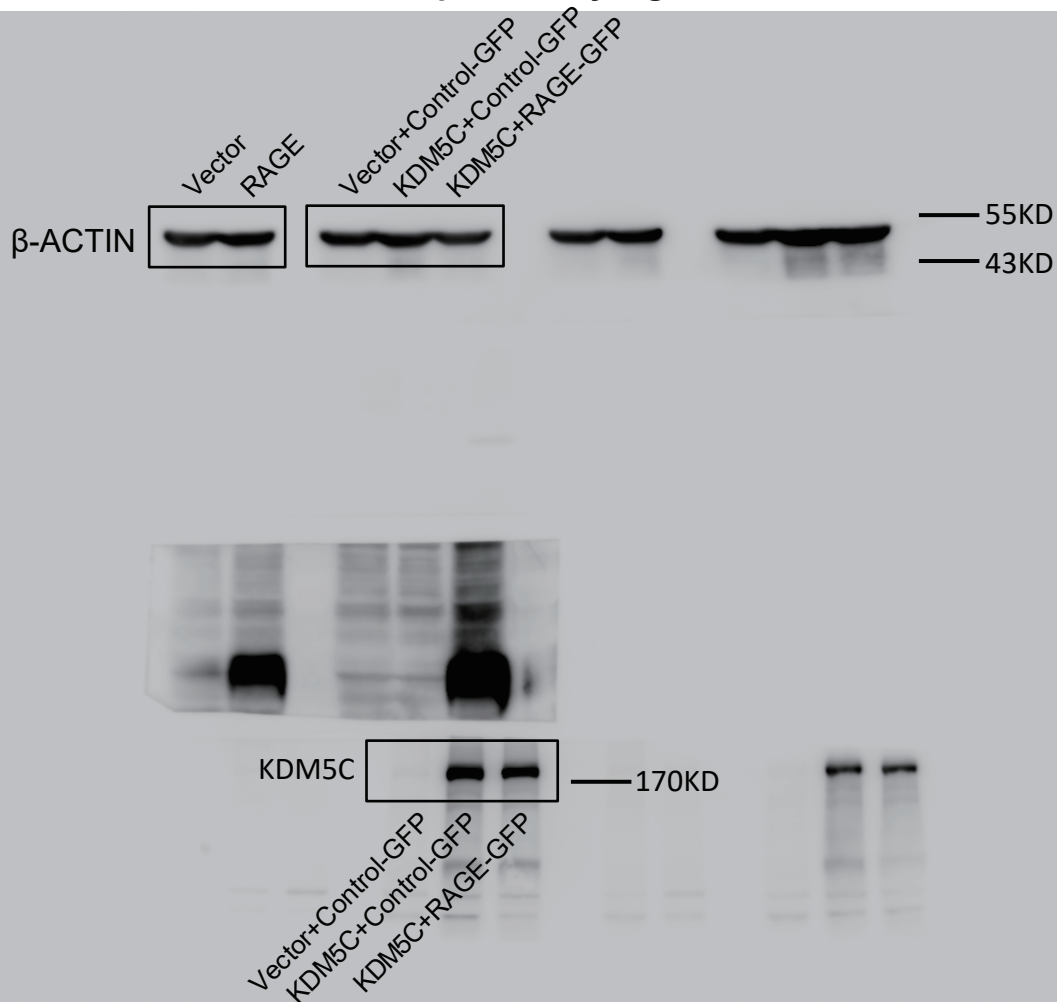



Supplementary Figure 6B

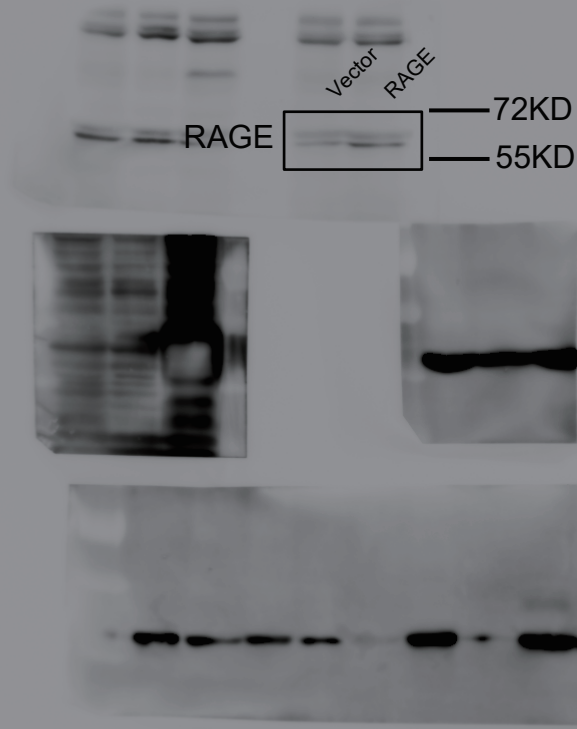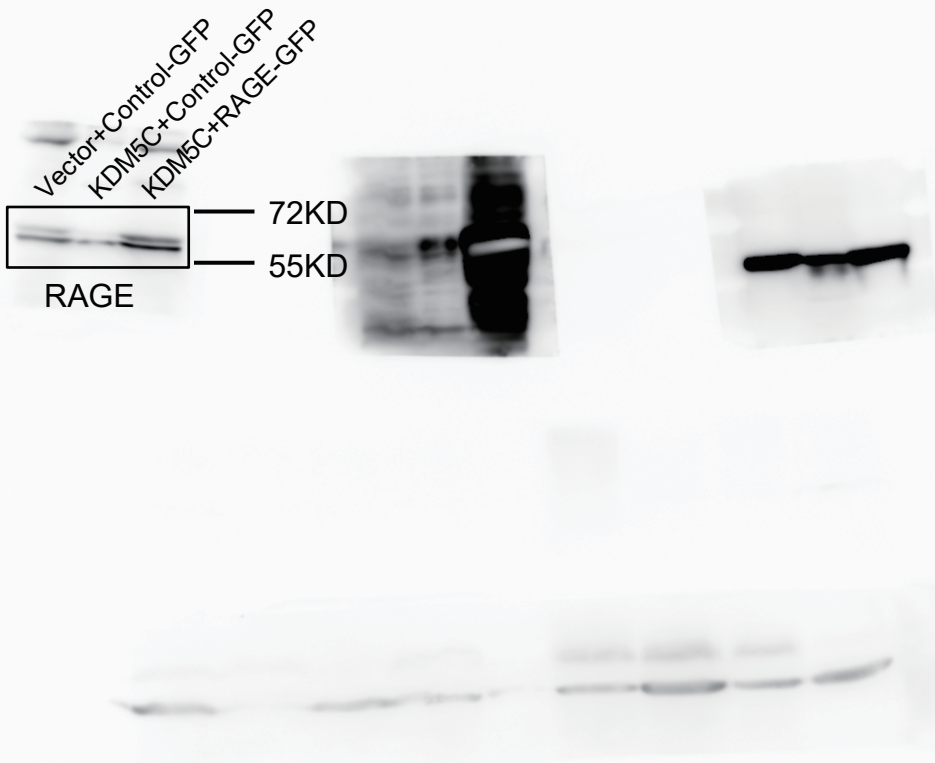

Supplement: 41420_2022_1284_MOESM2_ESM.pdf [file 41420_2022_1284_MOESM2_ESM.pdf]
