# Supplementary material for: Elevated histone demethylase KDM5C increases recurrent miscarriage risk by preventing trophoblast proliferation and invasion
Source: PubMed Central journal article supplement (PMC9780362; doi:10.1038/s41420-022-01284-y), 2022-12-22
Supplement: 41420_2022_1284_MOESM1_ESM.pdf [file 41420_2022_1284_MOESM1_ESM.pdf]

1 **Supplementary information**

2

3

4 **Elevated Histone demethylase KDM5C increases recurrent miscarriage risk by**  
5 **preventing trophoblast proliferation and invasion**

6

7

8 **Authors:** Min Xiao, Yan Zheng, Meng-Xi Wang, Yi-Hua Sun, Juan Chen, Kang-Yong

9 Zhu, Fan Zhang, Yun-Hui Tang, Fan Yang, Ting Zhou, Yue-Ping Zhang, Cai-Xia Lei,

10 Xiao-Xi Sun, Shan-He Yu, Fu-Ju Tian

11

12

13

14

15 **This supporting file includes:**

16 **Supplemental Materials and Methods**

17 **Supplemental Figures and Figure legends**

18

19

20

21

22

23

24

## 25 **Supplemental Materials and Methods**

### 26 **Flow cytometry analysis and cell sorting**

27 For flow cytometric cell cycle analysis, Ki-67 staining (561126, BD Biosciences) were  
28 measured. For flow cytometric apoptosis analysis, Annexin V-APC/BV421 staining  
29 (550474/563973, BD Biosciences) and 7-AAD (559925, BD Biosciences) were measured.  
30 Flow cytometry data was collected using a BD Calibur and analyzed with FlowJo software.  
31 For the fluorescence-activated cell sorting (FACS), the cells were sorted out using a cell  
32 sorter (BD FACSAria™).

### 33 **Immunohistochemistry**

34 Immunohistochemical staining was performed. In brief, tissue slides were deparaffinized and  
35 rehydrated. Endogenous peroxidase activity was blocked with 0.3% hydrogen peroxide for 20  
36 min. Slides were blocked with 5% FBS for 30 min and incubated with rabbit anti-KDM5C  
37 (OALA07572, Aviva Systems Biology, 1:100), or anti-TGFβ2 (ab36495, Abcam, 1:100), or  
38 anti-RAGE (ab3611, Abcam, 1:100) at 4°C overnight. After washing in PBS, the sections  
39 were incubated with biotinylated secondary antibodies and stained by using a Mouse and  
40 Rabbit Specific HRP/DAB IHC Detection Kit (ab236466, Abcam). Meyer's hematoxylin  
41 (Sigma-Aldrich) was used as a counterstain dye. A negative control was obtained by  
42 replacing the primary antibody with PBS. Images were captured with the Leica microscope  
43 (Leica, Buffalo Grove, IL).

### 44 **Extravillous Explant assay**

45 Small 2-3 mm villi explants were isolated from first-trimester human villi tissue (6-10 weeks  
46 of gestation) and then plated in 24-well culture dishes pre-coated with phenol red-free  
47 Matrigel® substrate (Corning Life Sciences) with DMEM/F12 media plus 10% FBS. Villi  
48 explant-initiated outgrowths were used for the subsequent experiments and are marked as 24  
49 h. EVT migration from the distal end of the villi explants was recorded for 72 h. ImageJ Pro  
50 software was used to assess the distance of migration. To assess the regulation of KDM5C on  
51 the migration of EVTs, KDM5C siRNA (250 nM), or control siRNA (250 nM) was

52 transfected into villi explants from RM patients or HCs. The pictures were taken after 24 h  
53 and 72 h using Leica light microscope. Villi explants from HCs were treated with lenti-vector  
54 control or lenti-KDM5C lentivirus, and pictures after 24 h and 72 h of *in vitro* culture were  
55 obtained using Leica microscope. The following siRNA sequences were used in this study:  
56 KDM5C siRNA-1, sense, 5'-GCAGAGAAAUCGGGCAUUUTT-3'; KDM5C siRNA-1,  
57 antisense, 5'-AAAUGCCCGAUUUCUCUGCTT-3'; KDM5C siRNA-2, sense, 5'-  
58 CCUUUAAAGCU- GACUACUUTT-3'; KDM5C siRNA-2, antisense, 5'-  
59 AAGUAGUCAGCUUUAAGG- TT-3'; KDM5C siRNA-3, sense, 5'-  
60 GCUGACACCUGAACUAUUUTT-3'; KDM5C siRNA-3, antisense, 5'-  
61 AAUAGUUCAGGUGUCAGCTT-3'.

## 62 **Western blotting**

63 Total cell lysates were loaded onto 8%-12% SDS polyacrylamide gels for running and then  
64 transferred to PVDF membranes. After blocking, the membranes were incubated for 2 hr with  
65 the primary antibodies. After staining with horseradish peroxidase (HRP)-linked secondary  
66 antibodies, signal detection was performed using a chemiluminescence phototope-HRP Kit  
67 (Millipore). The following antibodies were used: anti-KDM5C (ab34718, Abcam, 1:500),  
68 anti-TGF $\beta$ 2 (ab36495, Abcam, 1:1000), anti-RAGE (ab3611, Abcam, 1:1000) and  
69 anti- $\beta$ -ACTIN (A5316, Sigma, 1:5000).

## 70 **Colony formation assay**

71 HTR-8 stable cell lines were seeded into six-well plates at a density of  $8 \times 10^2$  cells/well.  
72 Cells were incubated at 37 °C in 5% CO<sub>2</sub> for about 10–14 days, fixed in 4% formalin for 15  
73 minutes, and stained with Giemsa solution (AppliChem, Darmstadt, Germany) after two  
74 washes with PBS. The number of colonies was counted after cells were allowed to air dry at  
75 room temperature.

## 76 **Cell proliferation assay**

77 HTR8 cells were plated at a density of  $2 \times 10^3$  cells per well in 96-well plates for the  
78 proliferation assay. Cell viability was analyzed at 24, 48 or 72 h using the CCK8 assay  
79 (Dojindo, Kumamoto, Japan).

80 **Mouse trophoblast isolation**

81 Percoll gradient Primary trophoblast were isolated by collagenase-DNase I digestion  
82 (Sigma-Aldrich, St. Louis, MO) and Percoll gradient (GE Healthcare, Amersham Place, UK)  
83 centrifugation from mature placenta on d 10.5, as previously described [6, 7]. The resultant  
84 trophoblast cell culture had a purity of approximately 80-90%, which was determined by  
85 immunostaining for cytokeratin 7. Purified trophoblasts were resuspend in culture medium  
86 (NCTC-135) for further experiments.

87

88

89

90

91

92

93

94

95

96

97

98

99

100

101

102

103 **Supplemental Figures and Figure legends**

Supplementary Figure 1

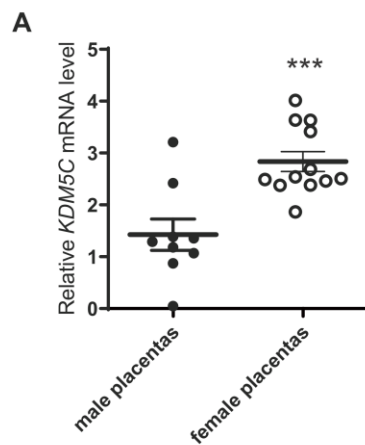

104

105

106 **Supplementary Figure 1. KDM5C expression in male and female placentas.**

107 (A) Level of *KDM5C* mRNA was determined in villi tissues of male placentas (n = 9) or

108 female placentas (n = 11) of RM patients using qRT-PCR assay. Data are shown as the

109 mean ± SEM; Student's *t* test was used to evaluate the statistical significance; \*\*\**p* <

110 0.001.

111

112

113

114

115

116

117

118

Supplementary Figure 2

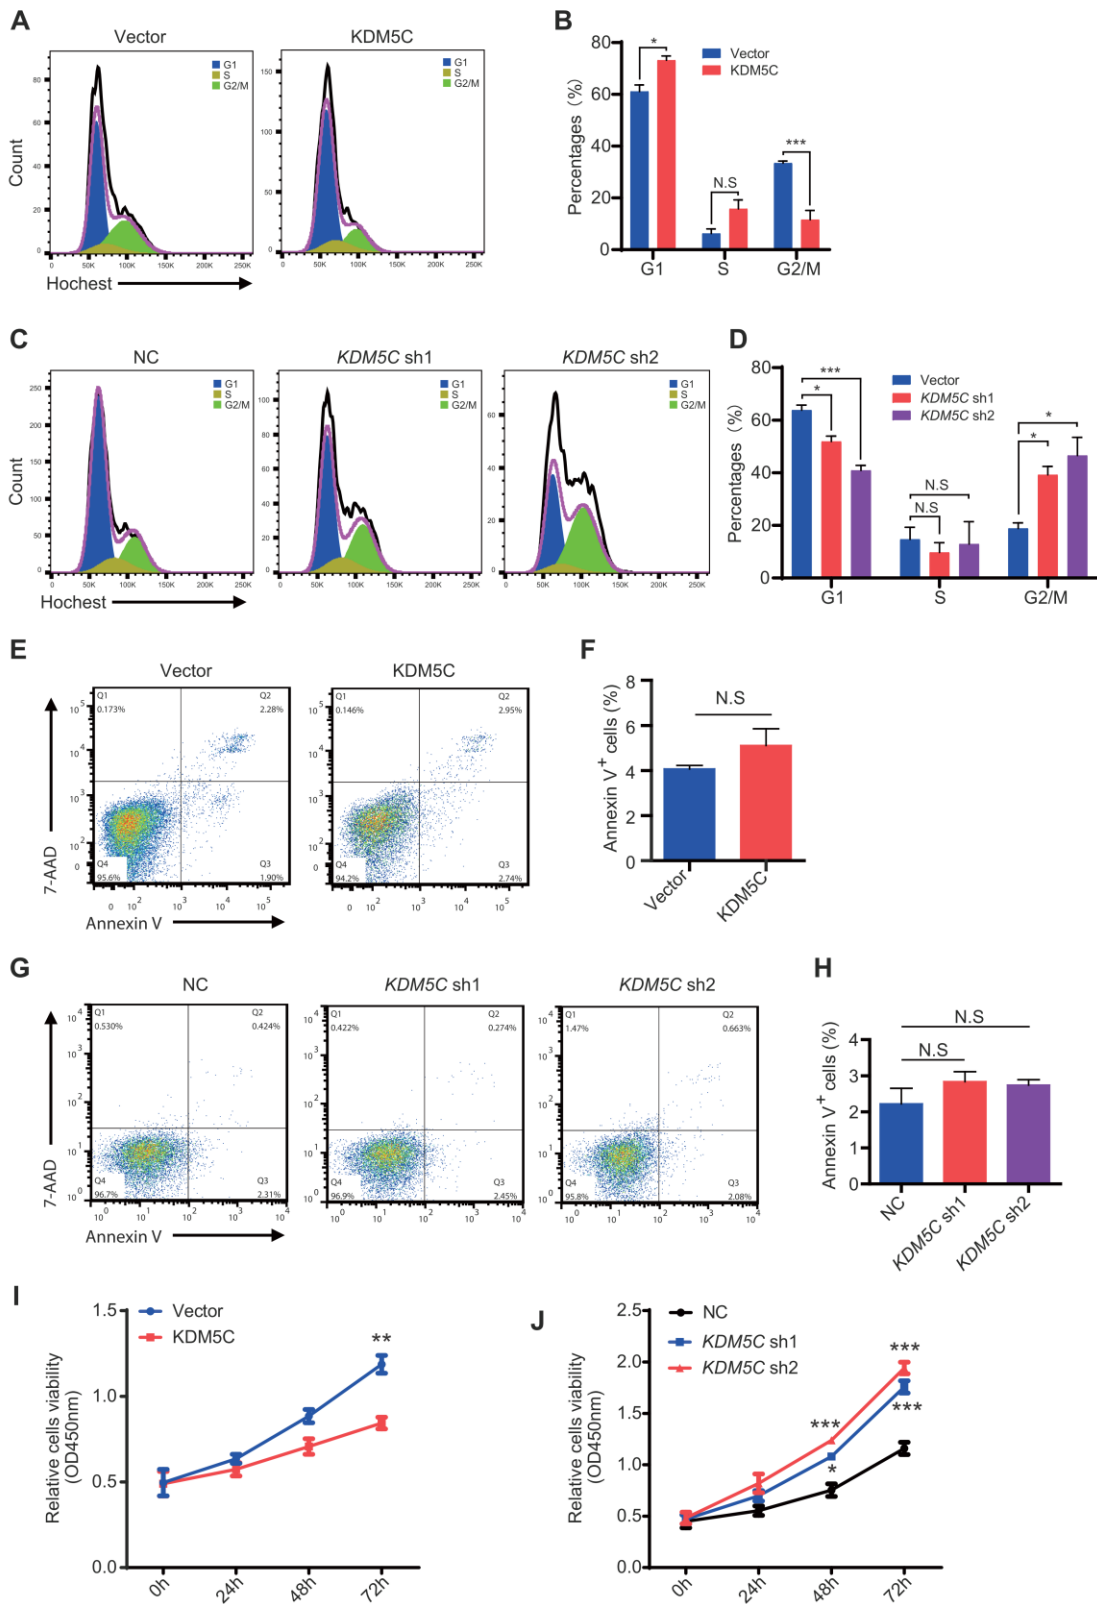

119  
120

121

122 **Supplementary Figure 2. KDM5C expression decreased trophoblast proliferation and**  
123 **invasion, related to Figure 2.**

124 (A-D) Flow cytometric analyses of cell cycle and the percentages of G1, S, G2/M  
125 phase in HTR8 cells in HTR-8 cells stably transduced with vector control, or  
126 KDM5C-expressing vector (A-B), or in HTR-8 cells transduced with NC shRNA or  
127 two *KDM5C* shRNAs (C-D). (E-H) Flow cytometric analyses of Annexin V/7-AAD  
128 staining in HTR-8 cells stably transduced with vector control, or KDM5C-expressing  
129 vector (E-F), or in HTR-8 cells transduced with NC shRNA or two *KDM5C* shRNAs  
130 (G-H). (I-J) Cell proliferation was analyzed by the CCK8 assay in HTR-8 cells stably  
131 transduced with vector control, or KDM5C-expressing vector (I), or in HTR-8 cells  
132 transduced with NC shRNA or two *KDM5C* shRNAs (J). B, D, H, I, J, the ANOVA test;  
133 F, Student's *t* test. Data are shown as the mean  $\pm$  SEM of three independent  
134 experiments; \**p* < 0.05, \*\**p* < 0.01, \*\*\**p* < 0.001.

135

136

137

138

139

140

141

142

143

144

145

146

147

Supplementary Figure 3

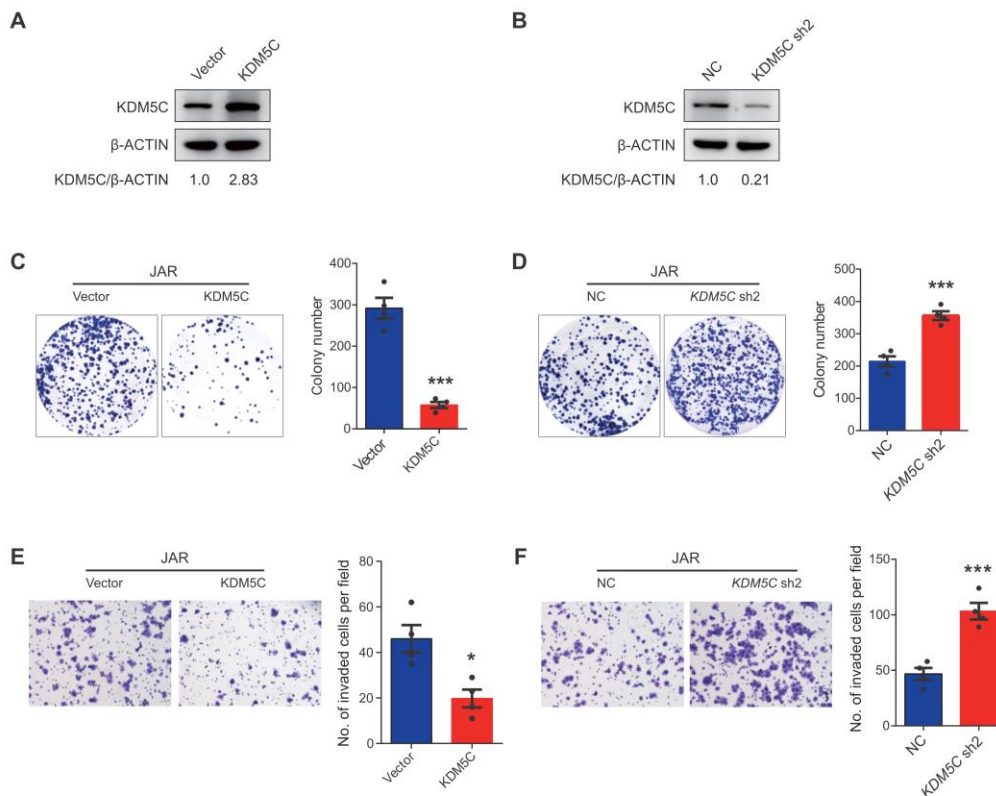

148

149 **Supplementary Figure 3. KDM5C suppresses trophoblast proliferation and**  
 150 **invasion of JAR cells, related to Figure 2.**

151 (A, B) Western blotting assay of KDM5C protein of JAR cells stably transduced with  
 152 vector control or KDM5C-expressing vector (A), or of JAR cells stably transduced  
 153 with NC shRNA or *KDM5C* shRNA-2 (B). (C-D) Colony formation assay of JAR  
 154 cells upon overexpression of KDM5C (C), or of JAR cells upon knockdown of  
 155 *KDM5C* (D). (E-F) Cell invasion assay of JAR cells upon overexpression of KDM5C  
 156 (E), or of JAR cells upon knockdown of *KDM5C* (F). Data are shown as the mean ±  
 157 SEM of four independent experiments; Student's *t* test was used to evaluate the  
 158 statistical significance; \**p* < 0.05, \*\*\**p* < 0.001.

159

160

161

162



## Supplementary Figure 4

A

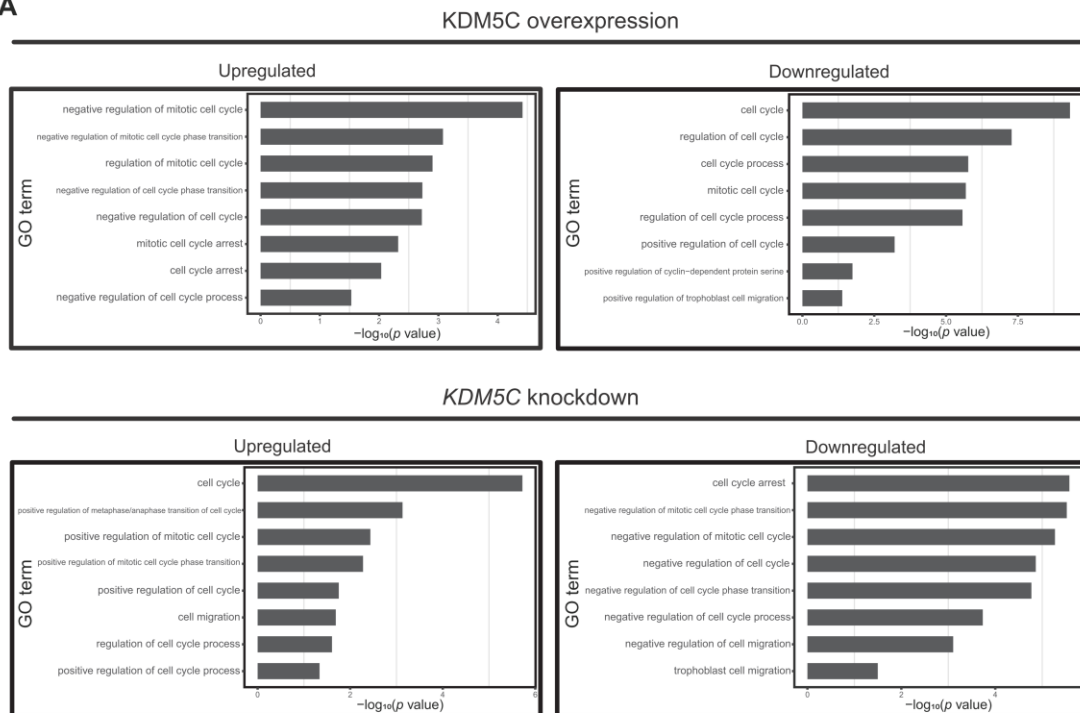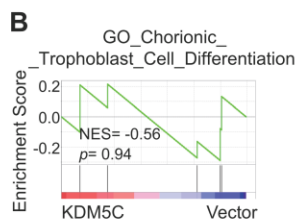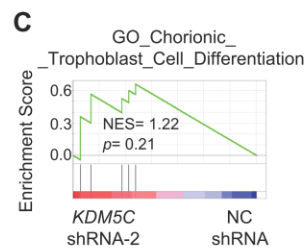

163

164 **Supplementary Figure 4. KDM5C inhibits key gene ontology categories of**  
 165 **trophoblast proliferation and invasion, related to Figure 4.**

166 (A) Summary of the functional categories of genes significantly enriched in HTR-8  
 167 cells upon KDM5C overexpression (upper panel) or knockdown (bottom panel).

168 Analyses were performed on the differentially expressed genes in HTR-8 cells by  
 169 KDM5C overexpression or knockdown using DAVID. (B-C) GSEA of the expression  
 170 profile of HTR-8 cells under KDM5C overexpression (B) or knockdown (C) using a  
 171 chorionic trophoblast cell differentiation-associated signature.

## Supplementary Figure 5

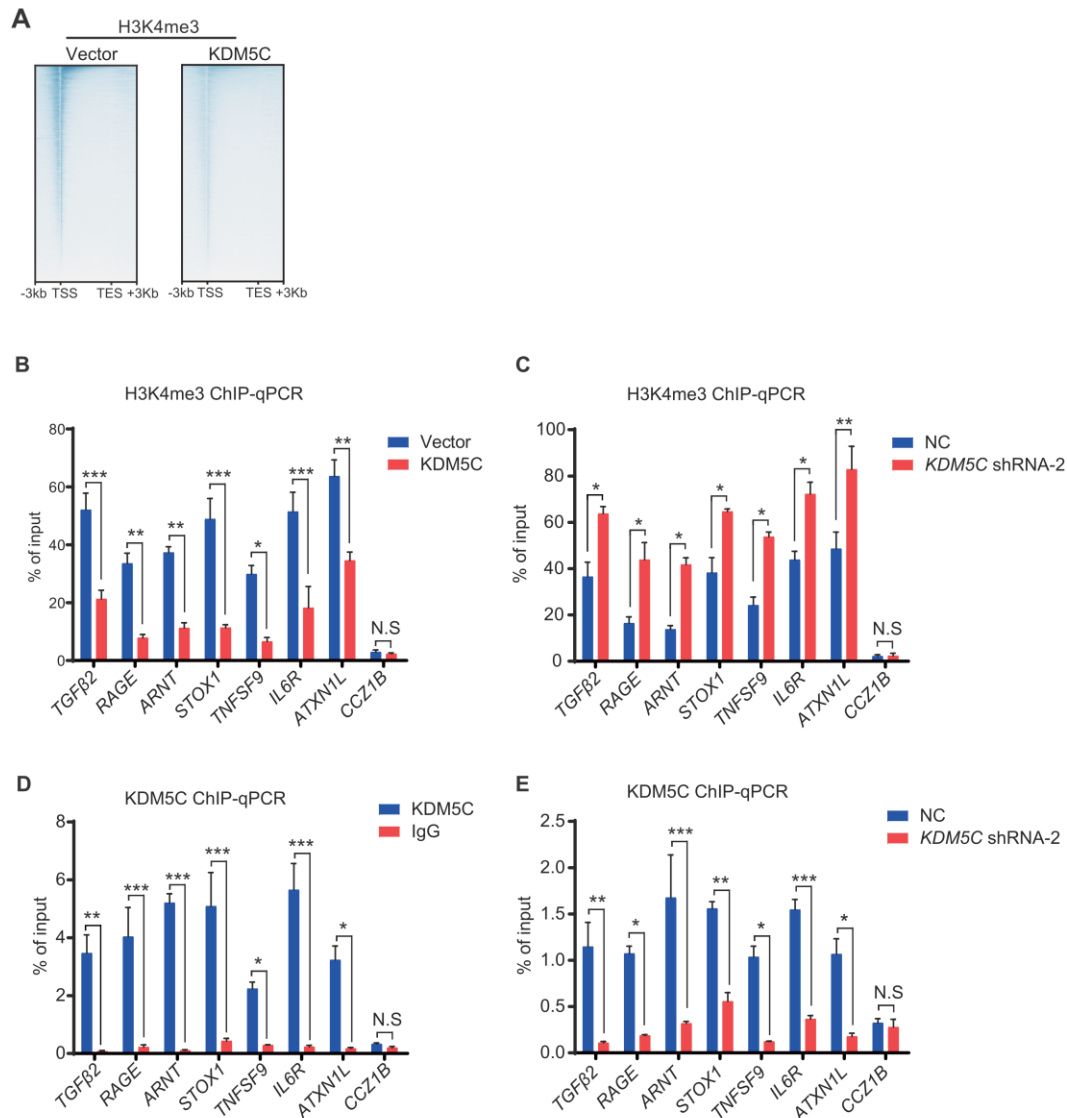

172

173 **Supplementary Figure 5. KDM5C regulates dynamic H3K4me3 in the promoter**

174 **of target genes, related to Figure 5.**

175 (A) Heatmap of H3K4me3 ChIP-seq signal within  $\pm$  3kb genomic regions from

176 anchors on the transcriptional start site (TSS) and transcriptional termination site

177 (TTS) of HTR-8 cells transduced with control or KDM5C-expressing vector. (B, C)

178 ChIP-qPCR assay of H3K4me3 occupancy at a number of gene loci in HTR-8 cells

179 stably transduced with control or KDM5C-expressing vector (B), or in HTR-8 cells

180 stably transduced with NC shRNA or *KDM5C* shRNA-2 (C). (D) ChIP-qPCR assay

181 of KDM5C or IgG occupancy at a number of gene loci in HTR-8 cells stably

182 transduced with KDM5C-expressing vector. (E) ChIP-qPCR assay of KDM5C

183 occupancy at a number of gene loci in HTR-8 cells stably transduced NC shRNA or  
184 *KDM5C* shRNA-2. Data are shown as the mean  $\pm$  SEM of three independent  
185 experiments; the ANOVA test was used to evaluate the statistical significance; \* $p$  <  
186 0.05, \*\* $p$  < 0.01, \*\*\* $p$  < 0.001.

187

188

189

190

191

192

193

194

195

196

197

Supplementary Figure 6

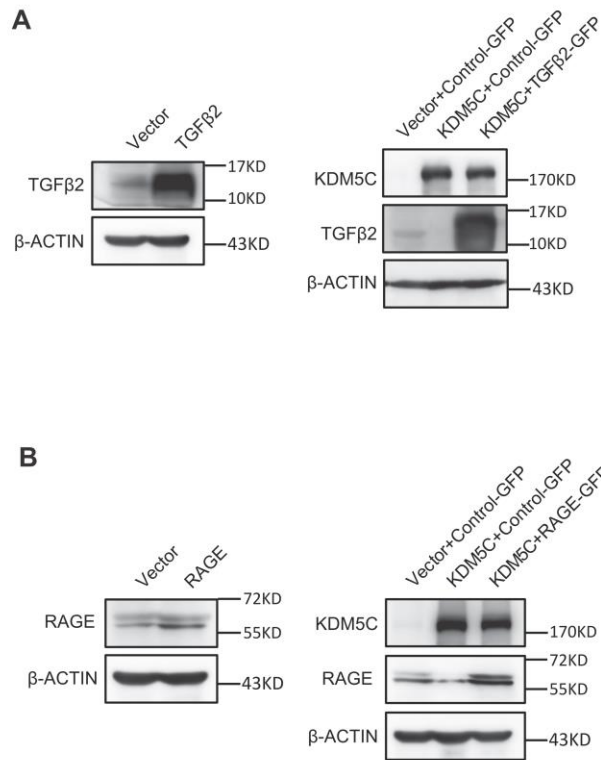

198

199 **Supplementary Figure 6, western blotting assay of TGFβ2 or RAGE, related to**  
200 **Figure 6.**

201 (A) Western blotting assay of TGFβ2 protein in HTR-8 cells transduced with vector  
202 control, or TGFβ2-expressing vector (left panel), western blotting assay of KDM5C  
203 and TGFβ2 protein for TGFβ2 overexpression experiments in HTR-8 cells transduced  
204 with control or KDM5C-expressing vector (right panel). (B) Western blotting assay of  
205 RAGE protein in HTR-8 cells transduced with vector control, or RAGE-expressing  
206 vector (left panel), western blotting assay of KDM5C and RAGE protein for RAGE  
207 overexpression experiments in HTR-8 cells transduced with control or  
208 KDM5C-expressing vector (right panel).
