# Supplementary material for: Elevated histone demethylase KDM5C increases recurrent miscarriage risk by preventing trophoblast proliferation and invasion
Source: PubMed Central journal article supplement (PMC9780362; doi:10.1038/s41420-022-01284-y), 2022-12-22
Supplement: 41420_2022_1284_MOESM5_ESM.pdf [file 41420_2022_1284_MOESM5_ESM.pdf]

Supplementary Table 3. Clinical and demographic characteristics of the patient groups in the screening and validation studies

|    | Type of samples | Maternal age (years) | Previous pregnancy losses | Gestation-parturition | Gestational age at sampling (days) | Karyotype |
|----|-----------------|----------------------|---------------------------|-----------------------|------------------------------------|-----------|
| 1  | HC              | 31                   | 0                         | G3P2                  | 53                                 | 46,XY     |
| 2  | HC              | 43                   | 0                         | G3P1                  | 47                                 | 46,XX     |
| 3  | HC              | 25                   | 0                         | G1P0                  | 46                                 | 46,XY     |
| 4  | HC              | 40                   | 1                         | G4P1                  | 49                                 | 46,XX     |
| 5  | HC              | 28                   | 0                         | G2P1                  | 65                                 | 46,XY     |
| 6  | HC              | 40                   | 0                         | G3P2                  | 44                                 | 46,XY     |
| 7  | HC              | 19                   | 0                         | G4P0                  | 53                                 | 46,XX     |
| 8  | HC              | 20                   | 0                         | G1P0                  | 50                                 | 46,XX     |
| 9  | HC              | 27                   | 0                         | G2P1                  | 49                                 | 46,XX     |
| 10 | HC              | 25                   | 0                         | G2P1                  | 42                                 | 46,XY     |
| 11 | HC              | 19                   | 0                         | G3P1                  | 41                                 | 46,XY     |
| 12 | HC              | 46                   | 0                         | G1P0                  | 53                                 | 46,XY     |
| 13 | HC              | 25                   | 0                         | G1P0                  | 46                                 | 46,XX     |
| 14 | HC              | 24                   | 0                         | G2P1                  | 45                                 | 46,XX     |
| 15 | HC              | 18                   | 0                         | G4P2                  | 49                                 | 46,XY     |
| 16 | HC              | 29                   | 1                         | G4P1                  | 50                                 | 46,XX     |
| 17 | HC              | 33                   | 0                         | G2P1                  | 50                                 | 46,XY     |
| 18 | HC              | 31                   | 0                         | G1P0                  | 44                                 | 46,XY     |
| 19 | HC              | 29                   | 0                         | G4P1                  | 40                                 | 46,XX     |
| 20 | HC              | 27                   | 0                         | G4P0                  | 35                                 | 46,XX     |
| 21 | HC              | 39                   | 0                         | G3P1                  | 43                                 | 46,XY     |
| 22 | HC              | 33                   | 0                         | G1P0                  | 43                                 | 46,XY     |
| 23 | HC              | 32                   | 0                         | G2P1                  | 43                                 | 46,XX     |
| 24 | HC              | 22                   | 0                         | G1P0                  | 49                                 | 46,XY     |
| 25 | HC              | 26                   | 0                         | G2P0                  | 65                                 | 46,XY     |
| 26 | HC              | 33                   | 0                         | G2P1                  | 53                                 | 46,XX     |
| 27 | RM              | 26                   | 2                         | G3P0                  | 54                                 | 46,XX     |
| 28 | RM              | 27                   | 2                         | G3P0                  | 51                                 | 46,XY     |
| 29 | RM              | 26                   | 3                         | G4P0                  | 63                                 | 46,XX     |
| 30 | RM              | 35                   | 2                         | G3P0                  | 53                                 | 46,XX     |
| 31 | RM              | 32                   | 2                         | G3P0                  | 48                                 | 46,XY     |
| 32 | RM              | 36                   | 2                         | G3P0                  | 44                                 | 46,XY     |
| 33 | RM              | 29                   | 3                         | G4P0                  | 43                                 | 46,XY     |
| 34 | RM              | 33                   | 3                         | G4P0                  | 61                                 | 46,XY     |
| 35 | RM              | 31                   | 2                         | G3P0                  | 56                                 | 46,XX     |
| 36 | RM              | 29                   | 2                         | G3P0                  | 49                                 | 46,XX     |
| 37 | RM              | 35                   | 2                         | G3P0                  | 42                                 | 46,XY     |
| 38 | RM              | 42                   | 2                         | G3P0                  | 45                                 | 46,XY     |
| 39 | RM              | 27                   | 3                         | G4P0                  | 47                                 | 46,XX     |
| 40 | RM              | 27                   | 4                         | G5P0                  | 40                                 | 46,XX     |
| 41 | RM              | 30                   | 2                         | G3P0                  | 52                                 | 46,XX     |

|    |    |    |   |      |    |       |
|----|----|----|---|------|----|-------|
| 42 | RM | 28 | 2 | G3P0 | 49 | 46,XX |
| 43 | RM | 35 | 3 | G5P1 | 54 | 46,XY |
| 44 | RM | 29 | 4 | G5P0 | 43 | 46,XY |
| 45 | RM | 35 | 3 | G4P0 | 43 | 46,XX |
| 46 | RM | 32 | 2 | G3P0 | 48 | 46,XY |
| 47 | RM | 34 | 3 | G5P1 | 42 | 46,XY |
| 48 | RM | 34 | 4 | G5P0 | 40 | 46,XX |
| 49 | RM | 30 | 3 | G4P0 | 47 | 46,XX |
| 50 | RM | 31 | 2 | G3P0 | 43 | 46,XY |
| 51 | RM | 31 | 3 | G4P0 | 48 | 46,XY |
| 52 | RM | 35 | 2 | G4P1 | 42 | 46,XX |
| 53 | RM | 35 | 4 | G5P0 | 62 | 46,XY |
| 54 | RM | 27 | 2 | G3P0 | 49 | 46,XY |
| 55 | RM | 30 | 2 | G3P0 | 44 | 46,XX |
| 56 | RM | 37 | 4 | G5P0 | 56 | 46,XX |
| 57 | RM | 43 | 3 | G4P0 | 55 | 46,XX |

G, for gestation which means pregnancy; P, for production which means production. For example, G2P1 means two pregnancies and one production.
